# Supplementary material for: Improved multilineage human hematopoietic reconstitution and function in NSGS mice
Source: PLoS One. 2018 Dec 12;13(12):e0209034. doi: 10.1371/journal.pone.0209034 (PMC6291127; doi:10.1371/journal.pone.0209034)
Supplement: S1 Table — (XLSX) [file pone.0209034.s001.xlsx]

## Sheet: Sheet1
Target	Vendor	Fluorochrome	Catalog #	Clone
CD10	BioLegend	PE-Cy7	312214	HI10a
CD11b	BD	APC	550019	ICRF44
CD11b	BD	Pacific Blue	558123	ICRF44
CD13	BD	APC	557454	WM15
CD13	BD	PE	555394	WM15
CD14	BD	PE	555398	M5E2
CD15	BD	APC	551376	HI98
CD16	BD	PE	555407	3G8
CD19	BD	APC	555415	HIB19
CD19	BD	PE-Cy7	557835	SJ25C1
CD19	BD	v450	560353	HIB19
CD20	BD	PE	555623	2H7
CD235a	BD	PE	555570	GA-R2 (HIR2)
CD25	BD	FITC	560990	M-A251
CD3	BD	APC	555335	UCHT1
CD3	BD	PE-Cy7	557851	SK7
CD33	BD	APC	551378	WM53
CD33	BD	PE	555450	WM53
CD34	BD	APC	555824	581
CD38	BD	PE	555460	HIT2
CD38	BD	v450	646851	HB7
CD4	BioLegend	PE	300508	RPA-T4
CD41	BD	APC	559777	HIP8
CD41	BD	PE	555467	HIP8
CD45	BD	APC	555485	HI30
CD45	BD	FITC	555482	HI30
CD45	BD	PE-Cy7	557748	HI30
CD45	BD	v450	560367	HI30
CD45RA	BioLegend	BV421	304129	HI100
CD45RO	BD	PE-Cy7	560608	UCHL1
CD56	BD	APC	555518	B159
CD56	BD	PE	555516	B159
CD61	BD	APC	564174	VI-PL2
CD61	BD	PE	555754	VI-PL2
CD8	BD	FITC	347313	SK1
IgD	BioLegend	PE	348203	IA6-2
IgG	BD	PE-Cy7	561298	G18-145
IgM	BD	FITC	555583	G155-228
ki-67	BD	PE	556027	B56
mouse CD45	BioLegend	AF700	103128	30-F11
mouse CD45	BD	APC-Cy7	557659	30-F11
mouse TER119	BioLegend	FITC	116205	TER-119
mouse FcyR	Miltenyi Biotec	N/A	130-059-901
human FcyR	Miltenyi Biotec	N/A	130-092-575
